# Supplementary material for: Degradation of carbamazepine and sulfamethoxazole in water by dielectric barrier discharge plasma coupled with a far UV-C (222 nm) system
Source: Royal Society of Chemistry journal article supplement (doi:10.1039/d4ew00564c), 2024-01-01
Supplement: d4ew00564c1.pdf [file d4ew00564c1.pdf]

22 **Table S1.** Physical properties of Sulfamethoxazole and Carbamazepine.

| Compound name             | Chemical structure                                                                | Formula                                                         | Molar mass (g mol <sup>-1</sup> ) | Solubility (mg/L) |
|---------------------------|-----------------------------------------------------------------------------------|-----------------------------------------------------------------|-----------------------------------|-------------------|
| Sulfamethoxazole<br>(SMX) | 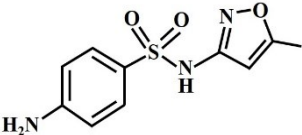 | C <sub>10</sub> H <sub>11</sub> N <sub>3</sub> O <sub>3</sub> S | 254.022                           | 610               |
| Carbamazepine<br>(CBZ)    |  | C <sub>15</sub> H <sub>12</sub> N <sub>2</sub> O                | 236.27                            | 112               |

23

24

25

26

27 **Table S2.** Characteristics of DIW and TW used in this study.

| Water matrix | Temperature<br>(°C) | pH   | Conductivity<br>(μS/cm) | TDS<br>(ppm) | H <sub>2</sub> O <sub>2</sub><br>(mg/l) | NO <sub>3</sub> <sup>-</sup><br>(mg/l) |
|--------------|---------------------|------|-------------------------|--------------|-----------------------------------------|----------------------------------------|
| TW           | 25                  | 5.63 | 304                     | 114          | 0                                       | 5.7                                    |
| DIW          | 25                  | 6.91 | 3                       | 1            | 0                                       | 0                                      |

28

29

30

## 31 **1.2 Development and Process of KrCl\* excimer source**

32 The fabrication of DBD based KrCl\* excilamp consisted of multiple parts. Firstly, the gas gap  
33 was evacuated up to  $1 \times 10^{-5}$  mbar of base pressure by using a roughing vacuum pump and the  
34 turbo molecular pump. After evacuating, the vacuum system was flushed with Argon ten times  
35 in a controlled manner to decrease the impurities up to a relatively low level. The gas gap was  
36 again evacuated up to  $2 \times 10^{-6}$  mbar pressure and filled with a mixture of research-grade KrCl  
37 gas (99.99%) by using the needle valves. The Kr/Cl<sub>2</sub> gas pressure of 150 mbar was optimized  
38 in the experiment and finally, the excilamp was pinched for further experimentations. The  
39 complete experimental setup used for the fabrication of KrCl\* excilamp is shown in **Fig. S1**.

40 The developed excimer source was operated by a bipolar pulsed power supply [1-10 kV, 5-40  
41 kHz, 1 A, 2  $\mu$ sec pulse width] at different power settings. For the visualization of voltage and  
42 current waveforms, a high voltage probe (Tektronix P6015A, 1000:1) and a Rogowski coil  
43 (Pearson 110, 0.1 V/A, 20 ns rise time) were connected to a four-channel mixed domain  
44 oscilloscope (Tektronix MDO3014, bandwidth 100 MHz, 2.5 GS/s). A calibrated  
45 thermocouple and IR camera were used to measure the temperature of the excimer source  
46 during experimentation.

47 The KrCl\* excimer can be formed by two mechanisms:

48 1. Three-body ion-ion recombination reaction,

49 When the electric field is applied between the electrodes of DBD excilamp, the discharge of  
50 gases takes place below atmospheric pressure, triggering the generation of highly energetic  
51 electrons, which cause the ionization and excitation of krypton and chlorine molecules. The  
52 cations of krypton and anions of chlorine get involved in a three-body recombination reaction  
53 with an atom/molecule of active species or buffer gas (M) and form the excimer (KrCl\*) as,

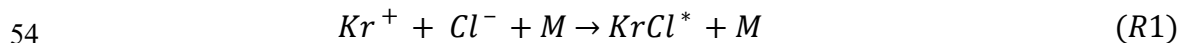

55 2. A harpoon reaction, i.e., a two-body reaction.

56 An excimer can also be formed by a harpooning reaction in which the excited krypton transfer  
 57 its loosely bound electron to the chlorine molecule to form an electronically excited state of  
 58  $KrCl^*$ .

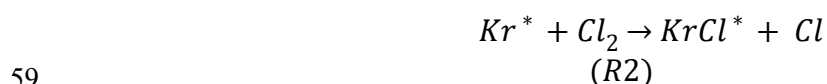

60 Generally, the  $KrCl^*$  excimer have a short lifetime and decomposes rapidly in the nanosecond  
 61 timescale and emits photons having a wavelength of 222 nm as

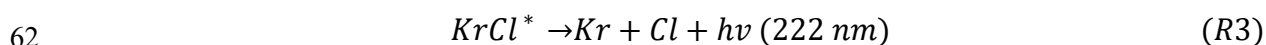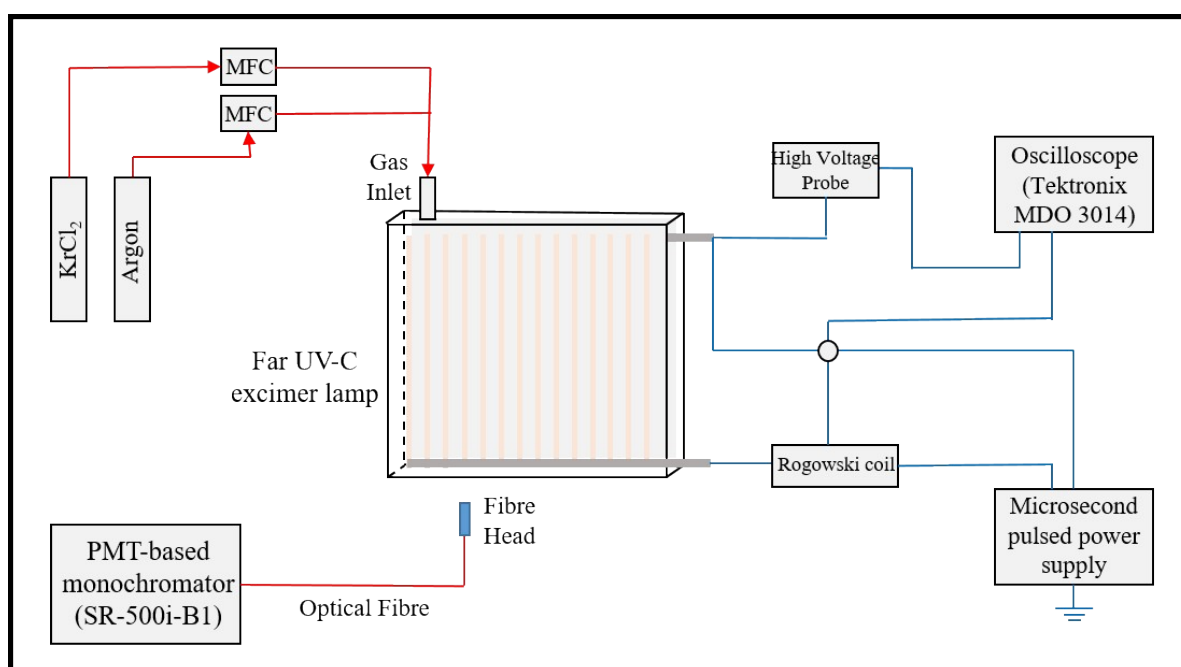

63  
 64 **Fig. S1.** Complete experimental setup for the development of far UV-C planer excimer  
 65 source.

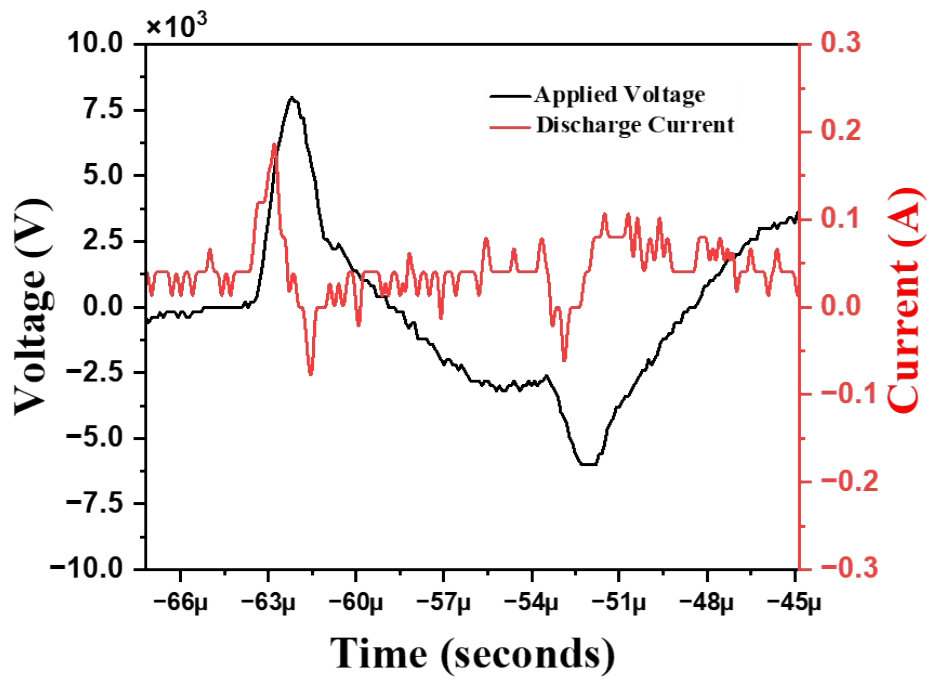

66

67

Fig. S2. Typical V-I characteristics of the used power source

68

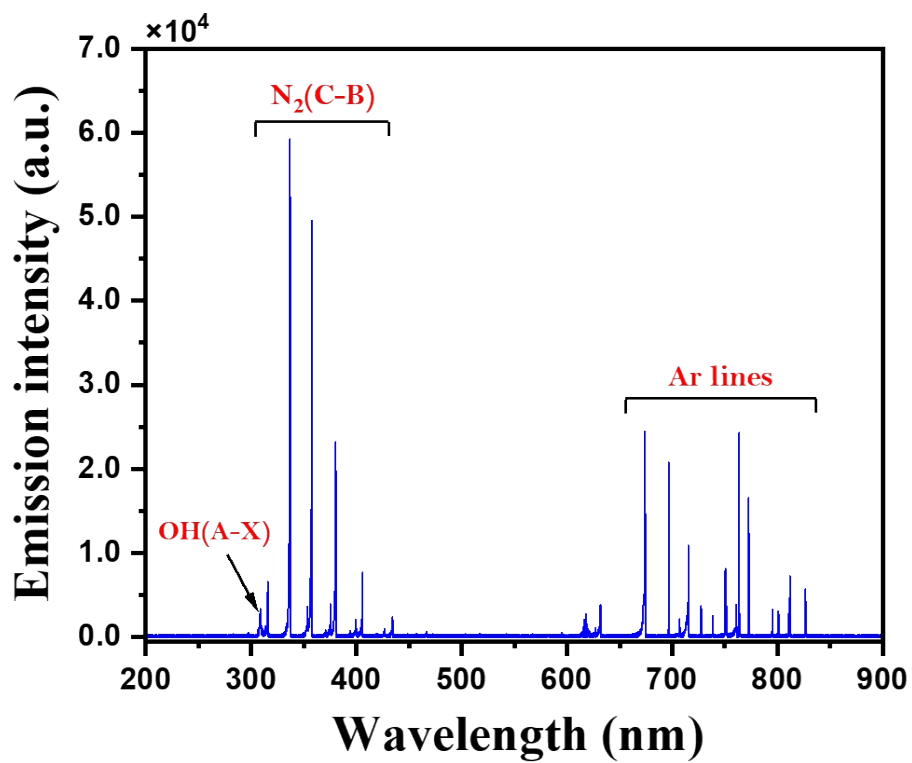

69

70

Fig. S3. Emission spectra of the atmospheric DDBD plasma.

71

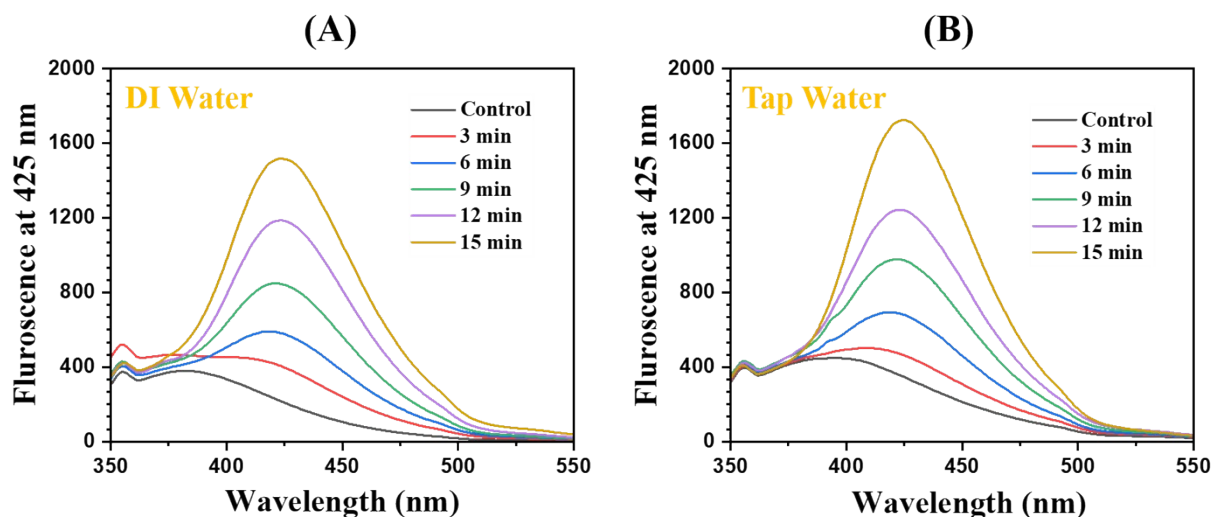

72

73 **Fig. S4.** Fluorescence spectra of TA in (a) DI water and (b) Tap water after treatment with

74

DDBD plasma source.

75

76 **Table S3.** Concentration of  $H_2O_2$ ,  $NO_3^-$  and  $NO_2^-$  in the aqueous solution in the presence of

77 SMX and CBZ.

| Time<br>(minutes) | $NO_2^-$ (mg/L) |      |      |      | $NO_3^-$ (mg/L) |     |      |      | $H_2O_2$ (mg/L) |      |      |      |
|-------------------|-----------------|------|------|------|-----------------|-----|------|------|-----------------|------|------|------|
|                   | CBZ             |      | SMX  |      | CBZ             |     | SMX  |      | CBZ             |      | SMX  |      |
|                   | DIW             | TW   | DIW  | TW   | DIW             | TW  | DIW  | TW   | DIW             | TW   | DIW  | TW   |
| <b>3</b>          | 5.74            | 6.52 | 6.12 | 7.72 | 61.2            | 106 | 59.3 | 96.1 | 0.17            | 0.26 | 0.19 | 0.23 |
| <b>6</b>          | 6.96            | 8.12 | 7.66 | 8.92 | 91.8            | 115 | 92.6 | 103  | 0.31            | 0.51 | 0.34 | 0.44 |
| <b>9</b>          | 7.15            | 8.74 | 7.58 | 7.43 | 105             | 133 | 100  | 140  | 0.46            | 0.74 | 0.51 | 0.78 |

|           |      |      |      |      |     |     |     |     |      |      |      |      |
|-----------|------|------|------|------|-----|-----|-----|-----|------|------|------|------|
| <b>12</b> | 7.27 | 8.93 | 8.02 | 10.1 | 147 | 157 | 153 | 163 | 0.76 | 1.03 | 0.83 | 0.98 |
| <b>15</b> | 6.17 | 7.02 | 7.27 | 8.22 | 188 | 208 | 191 | 213 | 0.93 | 1.09 | 1.02 | 1.12 |

78

79

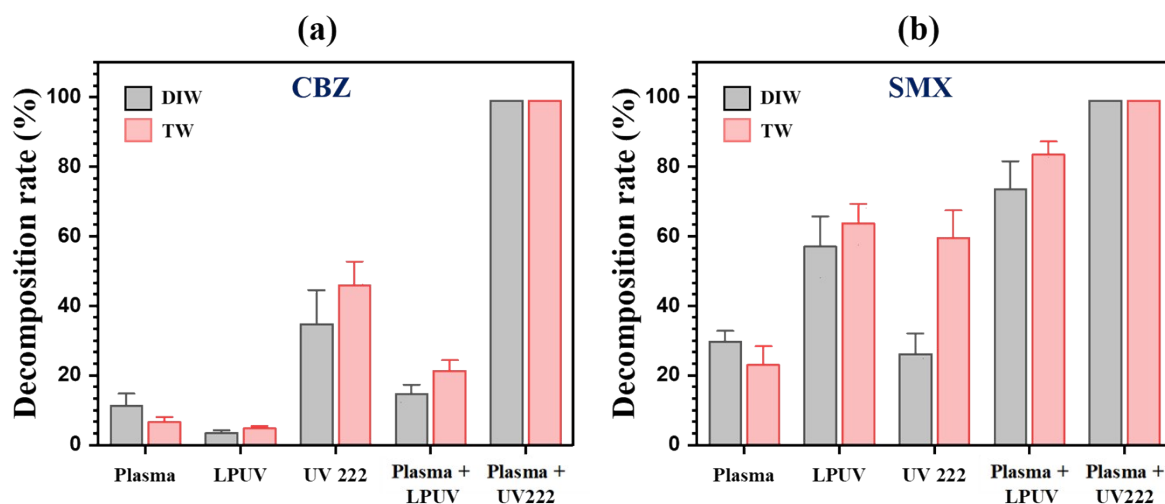

80

81 **Fig. S5.** Degradation rate of (a) CBZ and (b) SMX using different methods for 15 minutes of  
 82 treatment ( $C_0 = 10$  mg/L, UV Intensity =  $1050 \mu\text{W}/\text{cm}^2$  and pH 6-7).

83

84 **Table S4.** Time required for the complete degradation of SMX and CBZ under various  
 85 treatment processes.

| Complete Degradation<br>(min) | CBZ |     | SMX |     |
|-------------------------------|-----|-----|-----|-----|
|                               | DIW | TW  | DIW | TW  |
| <b>Plasma</b>                 | 180 | 210 | 90  | 120 |
| <b>LPUV</b>                   | 420 | 390 | 30  | 25  |

|                        |    |    |    |    |
|------------------------|----|----|----|----|
| <b>UV 222</b>          | 60 | 40 | 60 | 30 |
| <b>Plasma + LPUV</b>   | 90 | 60 | 22 | 20 |
| <b>Plasma + UV 222</b> | 15 | 12 | 10 | 8  |

86
